# Supplementary material for: Rapid Preparation of Superabsorbent Self-Healing Hydrogels by Frontal Polymerization
Source: MDPI journal article supplement (doi:10.3390/gels9050380), 2023-05-05
Supplement: s1 [file s1]

## Supplementary Materials

### **Rapid Preparation of Superabsorbent Self-Healing Hydrogels by Frontal Polymerization**

Ying Qin, Hao Li, Hai-Xia Shen, Cai-Feng Wang,\* and Su Chen\*

*State Key Laboratory of Materials-Oriented Chemical Engineering, College of Chemical Engineering, Nanjing Tech University, 5 Xin Mofan Road, Nanjing 210009, P. R. China.*

*Correspondence: caifengwang@njtech.edu.cn; chensu@njtech.edu.cn.*

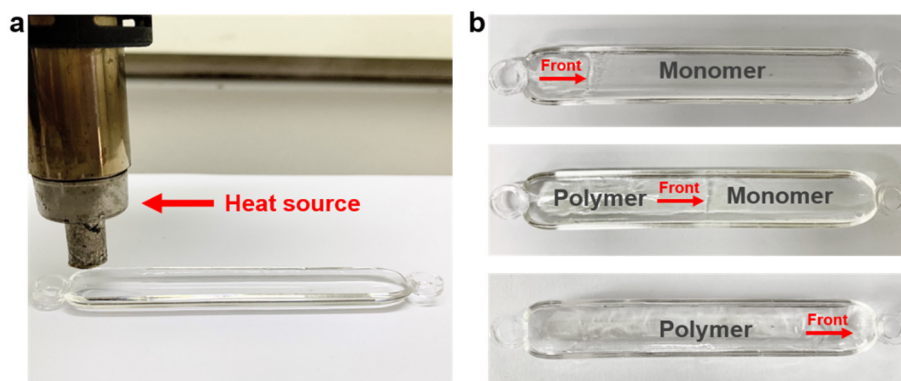

**Figure S1.** Pictures of (a) the setup for the horizontal FP process and (b) self-propagating front during the process of FP enabling the transformation of monomers to hydrogel polymers of poly(AM-co-AA-co-SBMA).

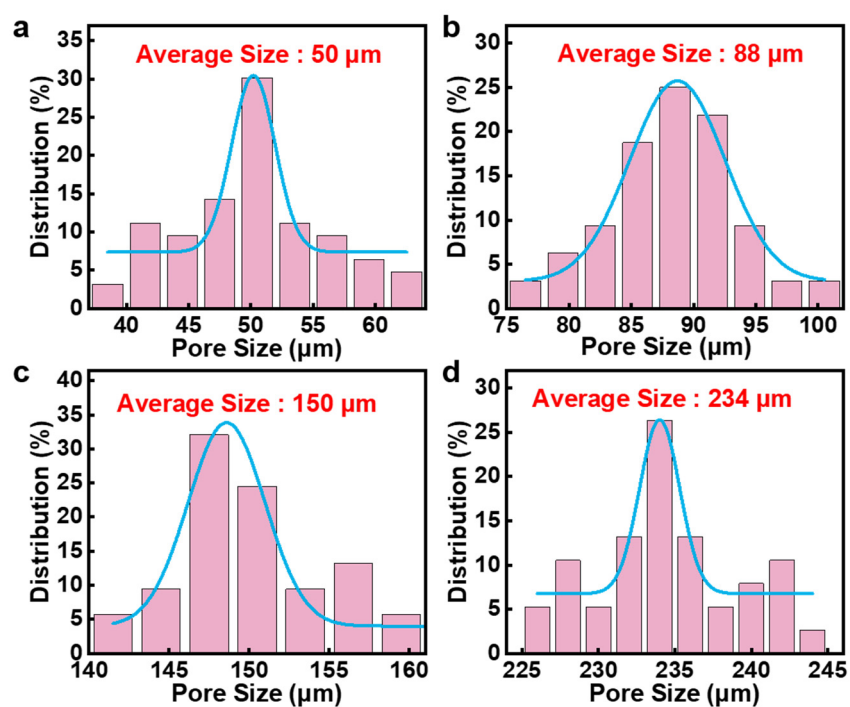

**Figure S2.** Pore size distributions of poly(AM-co-AA-co-SBMA) hydrogels synthesized from AM/AA ratio of (a) 10: 3, (b) 9: 4, (c) 8: 5 and (d) 7: 6 (wt/wt). SBMA = 10 wt%.

**Table S1.** Average pore size and mesh size of poly(AM-co-AA-co-SBMA) hydrogels.

| AM/AA mass ratio (wt/wt) | Average pore size ( $\mu\text{m}$ ) | Mesh size (nm) |
|--------------------------|-------------------------------------|----------------|
| 10: 3,                   | 50                                  | 59.3           |
| 9: 4                     | 88                                  | 63.0           |
| 8: 5                     | 150                                 | 63.6           |
| 7: 6                     | 234                                 | 66.7           |
